# Supplementary material for: A coordination environment effect of single-atom catalysts on their nitrogen reduction reaction performance
Source: Royal Society of Chemistry journal article supplement (doi:10.1039/d2cp02096c), 2022-01-01
Supplement: d2cp02096c1.pdf [file d2cp02096c1.pdf]

## Supporting Information

### Coordination environment effect of single-atom catalysts on their nitrogen reduction reaction performance

Miaomiao Han<sup>a\*</sup>, Youjie Huang<sup>a</sup>, Haimin Zhang<sup>b\*</sup>

<sup>a</sup> School of Science, Huzhou University, Huzhou, 313000, P. R. China

<sup>b</sup> Key Laboratory of Materials Physics, Centre for Environmental and Energy Nanomaterials, Anhui Key Laboratory of Nanomaterials and Nanostructures, CAS Center for Excellence in Nanoscience, Institute of Solid State Physics, Chinese Academy of Sciences, Hefei 230031, China

Table S1. The calculated magnetic moment of different configurations.

| configuration        | O <sub>4</sub> | NO <sub>3</sub> | N <sub>2</sub> O <sub>2</sub> | N <sub>3</sub> O | N <sub>4</sub> | N <sub>3</sub> C | N <sub>2</sub> C <sub>2</sub> | NC <sub>3</sub> | C <sub>4</sub> | C <sub>3</sub> O | C <sub>2</sub> O <sub>2</sub> | C <sub>1</sub> O <sub>3</sub> |
|----------------------|----------------|-----------------|-------------------------------|------------------|----------------|------------------|-------------------------------|-----------------|----------------|------------------|-------------------------------|-------------------------------|
| Magnetic moment (μB) | 2.92           | 3.01            | 3.14                          | 1.57             | 1.92           | 2.22             | 2.26                          | 2.68            | 2.24           | 2.45             | 1.98                          | 1.60                          |

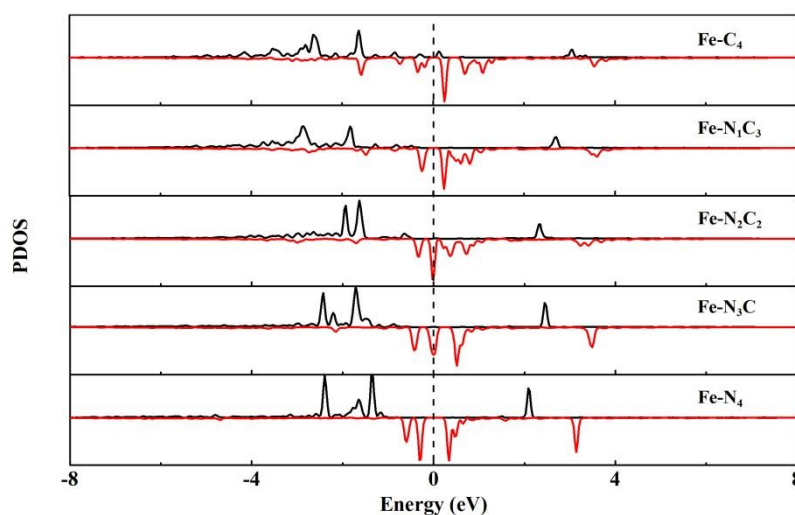

Fig. S1. PDOS of Fe-3d in Fe-N<sub>4-x</sub>C<sub>x</sub>-C, the Fermi level is denoted by the vertical dash line and set at 0 eV.

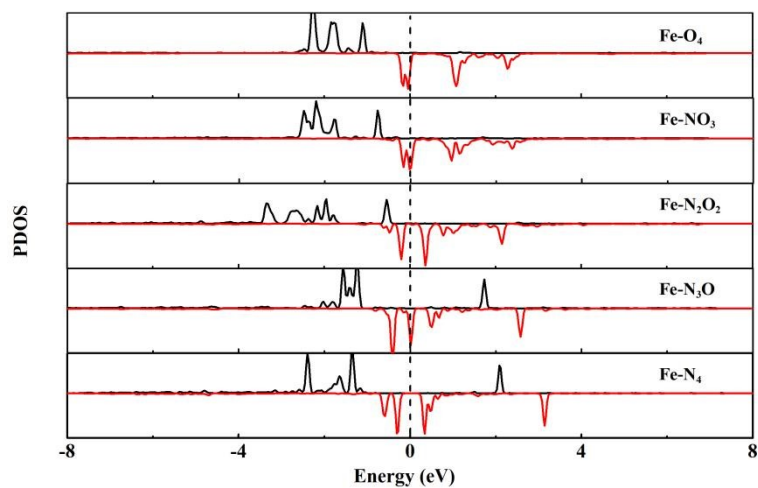

Fig. S2. PDOS of Fe-3d in  $\text{Fe-N}_x\text{O}_{4-x}\text{-C}$ , the Fermi level is denoted by the vertical dash line and set at 0 eV.

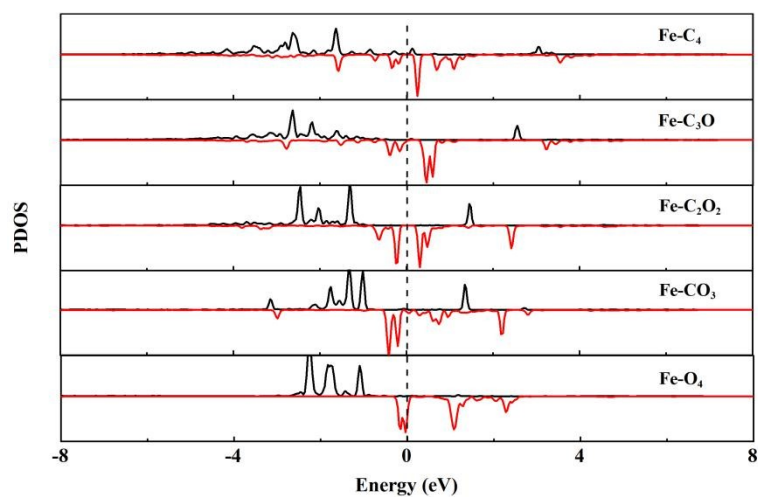

Fig. S3. PDOS of Fe-3d in  $\text{Fe-C}_{4-x}\text{O}_x\text{-C}$ , the Fermi level is denoted by the vertical dash line and set at 0 eV.
